# Supplementary material
Source: PubMed Central journal article supplement (PMC4531110)
Supplement: NIHMS664772-supplement-Supp_FigureS1-S3___Tables1.pdf [file NIHMS664772-supplement-Supp_FigureS1-S3___Tables1.pdf]

# Supplementary Figure 1A.

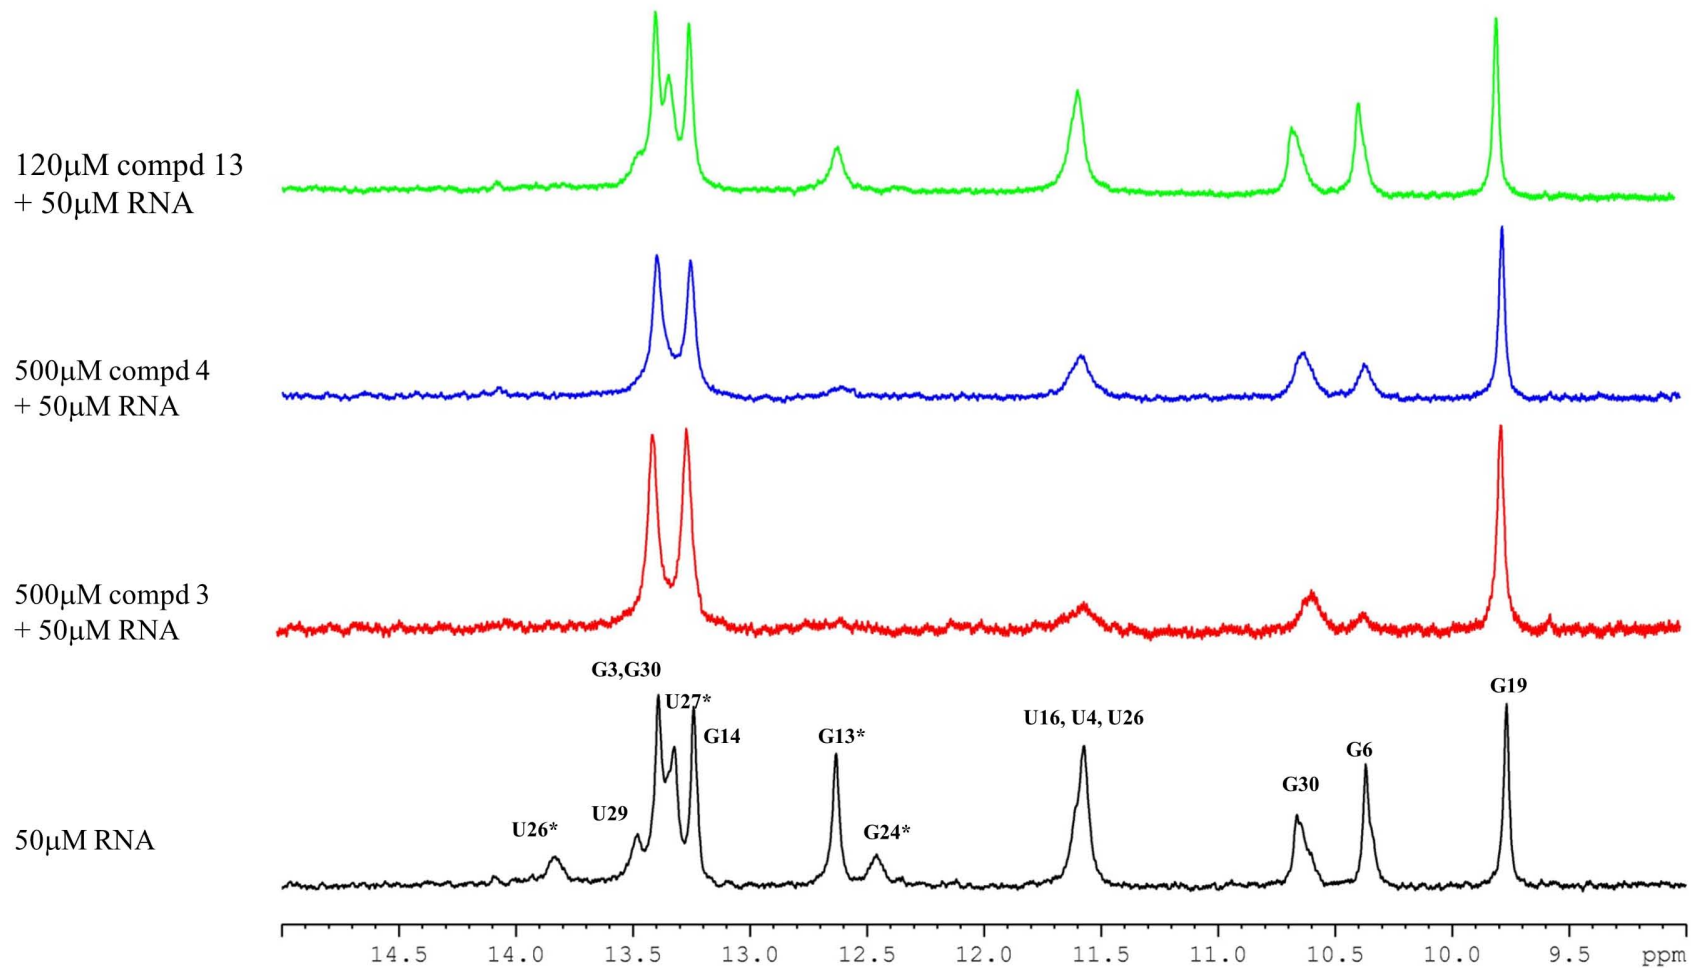

## Supplementary Figure 1B.

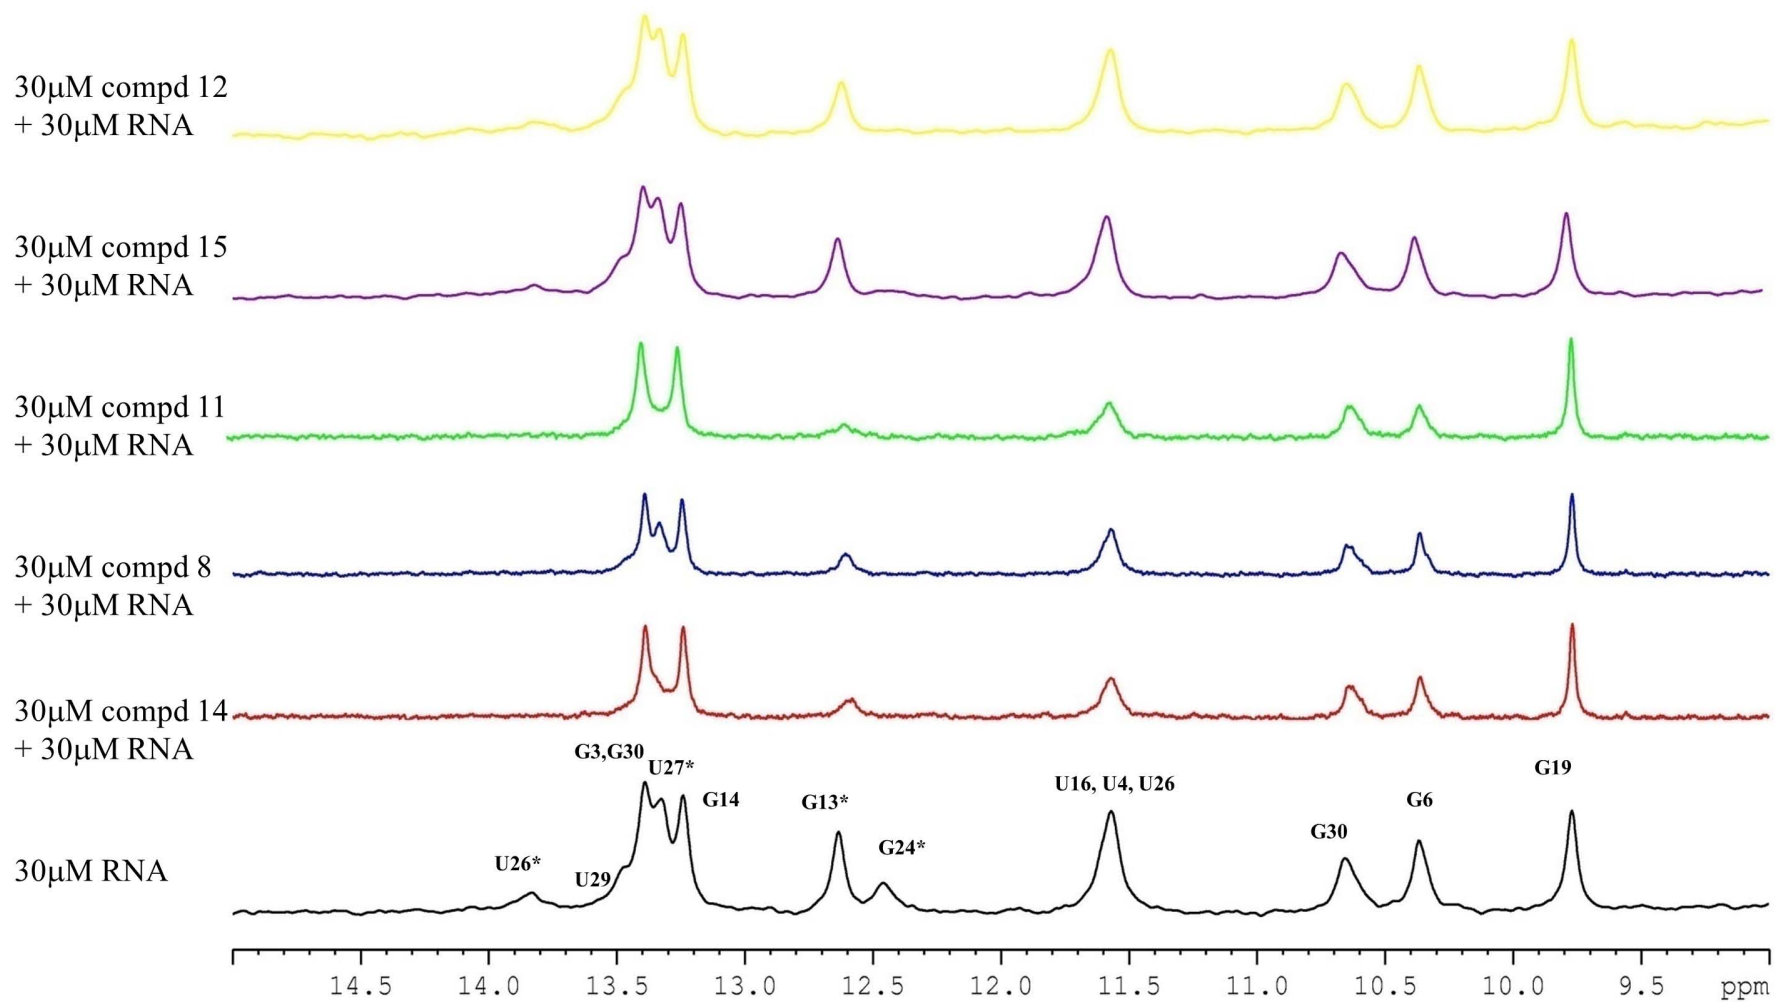

# Supplementary Figure 1C.

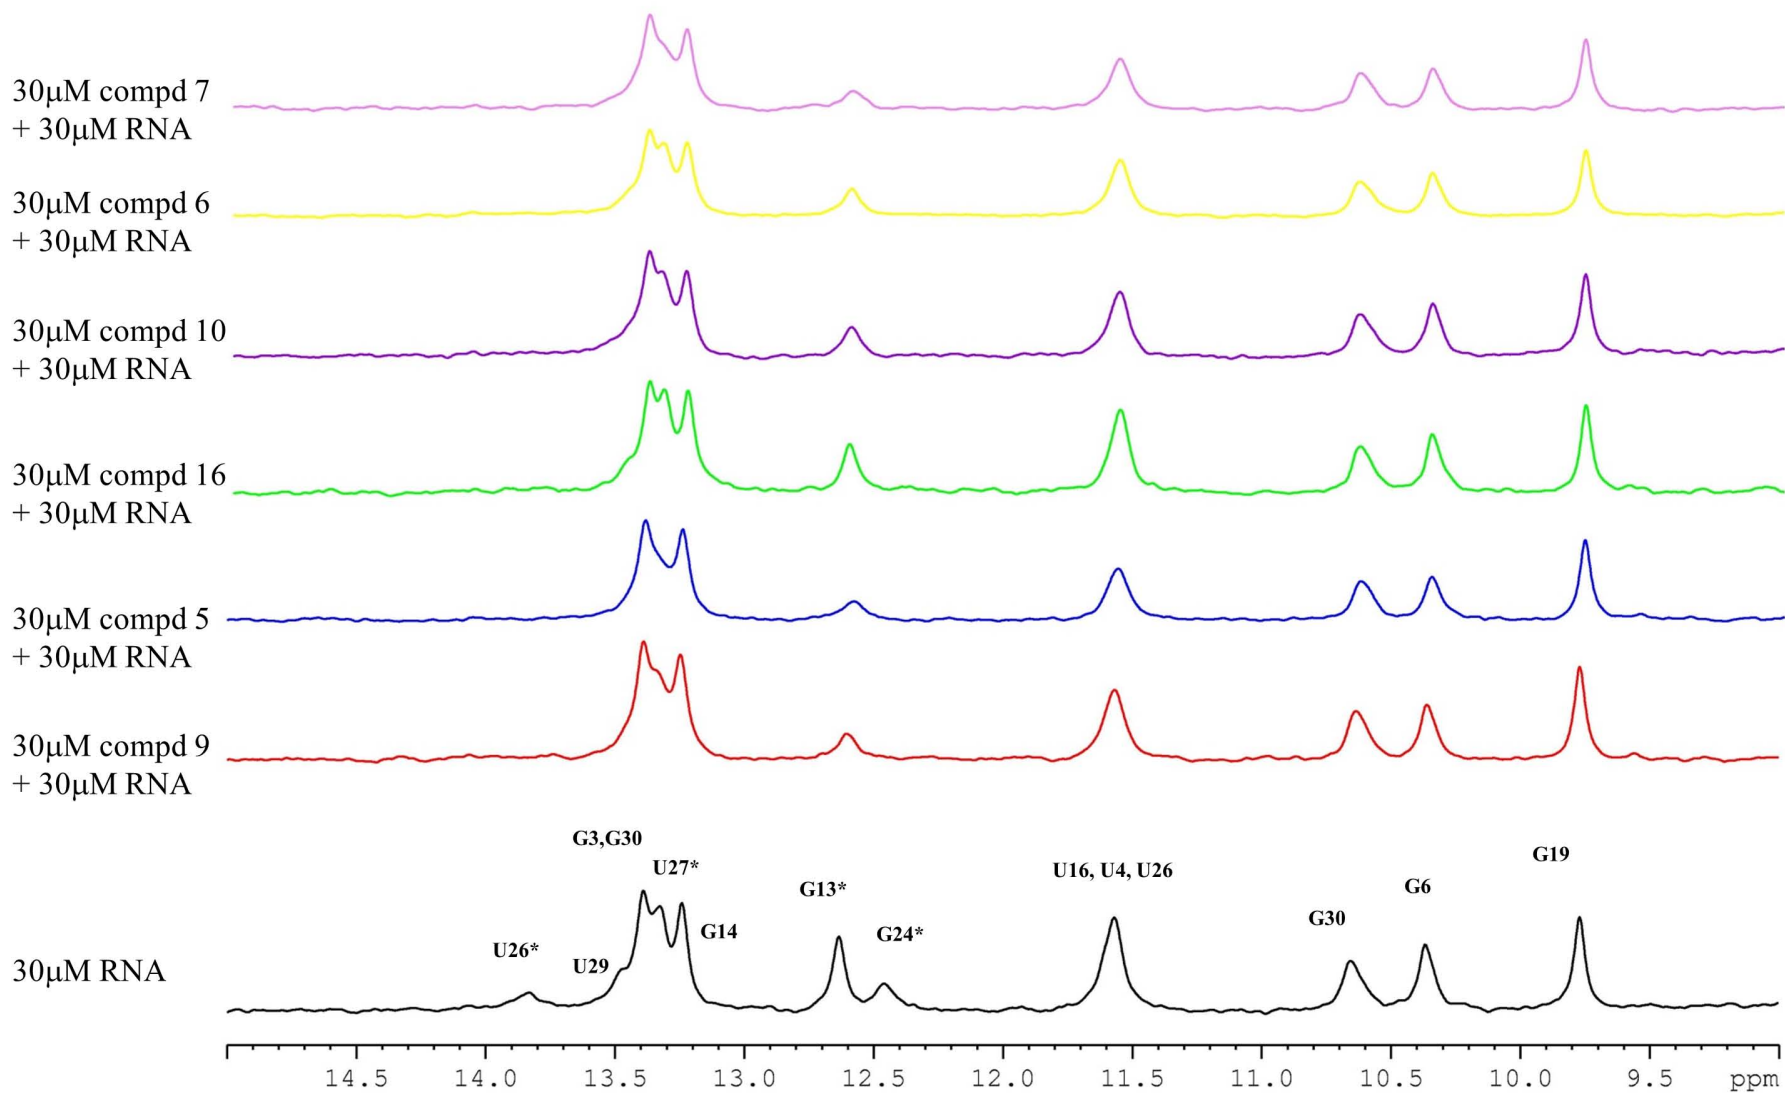

## Supplementary Figure 2.

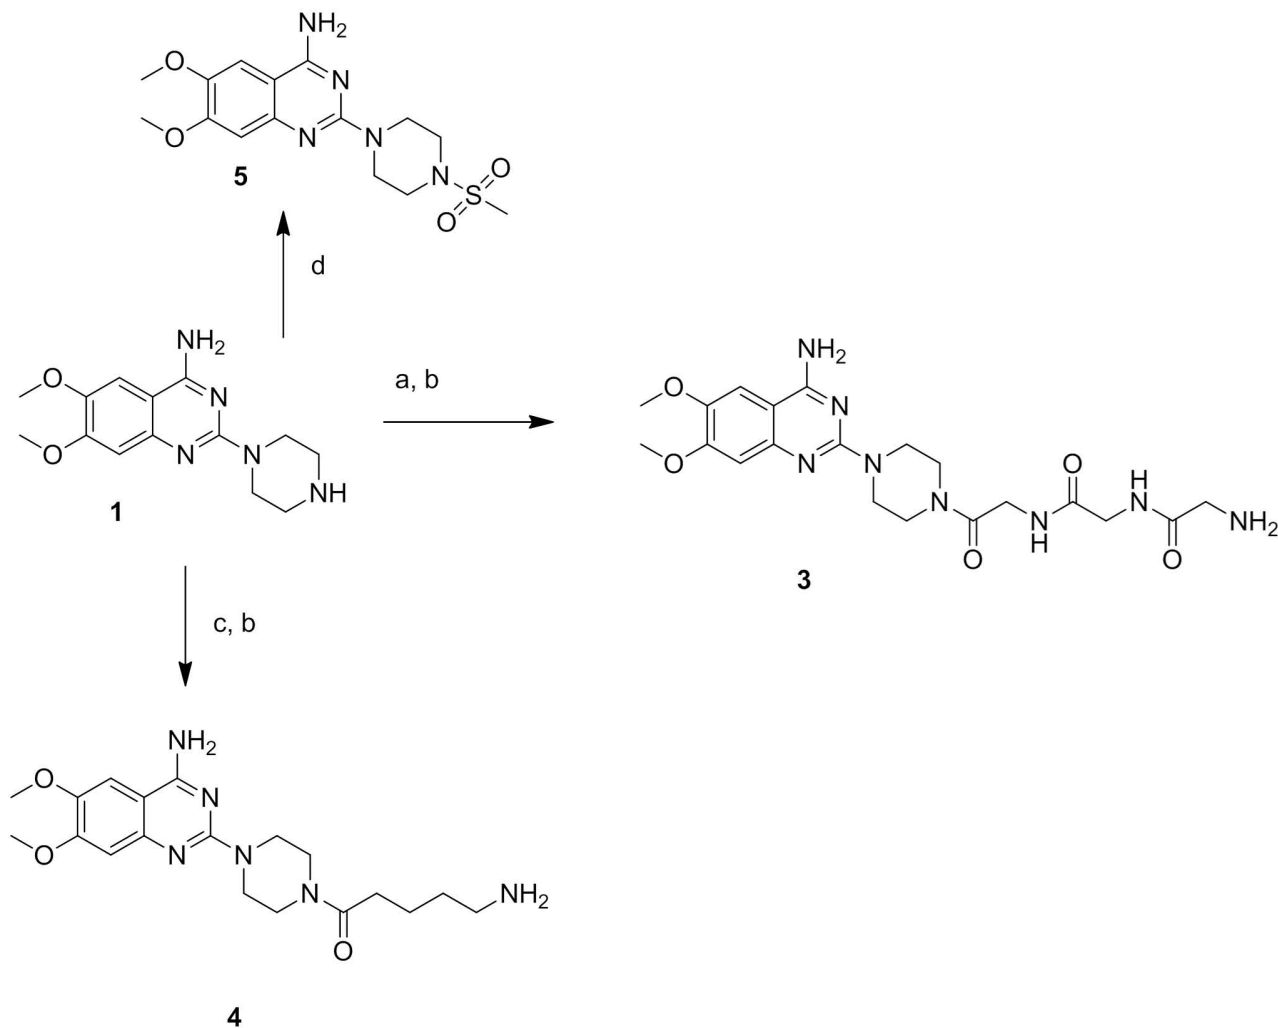

**Supplementary figure 2: Reagents and conditions:** (a) Boc-Gly-Gly-Gly-OH, Oxyma pure, DIC, DIEA, DMF, rt, 18 h; (b) 50% TFA in dichloromethane, rt, 3 h; (c) 5-Boc-aminopentanoic acid, Oxyma pure, DIC, DIEA, DMF, rt, 18 h; (d) Methanesulfonyl chloride, DIEA, DMF, rt, 6 h.

# Supplementary Figure 3.

3A

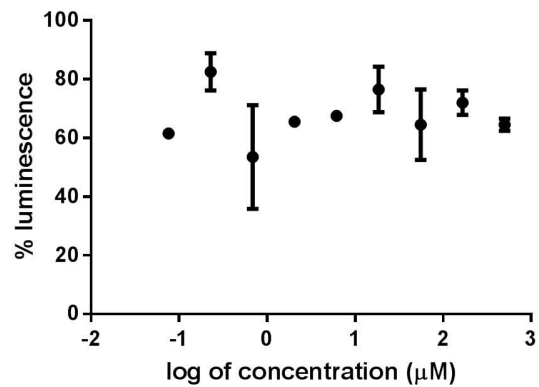

compound 3

3B

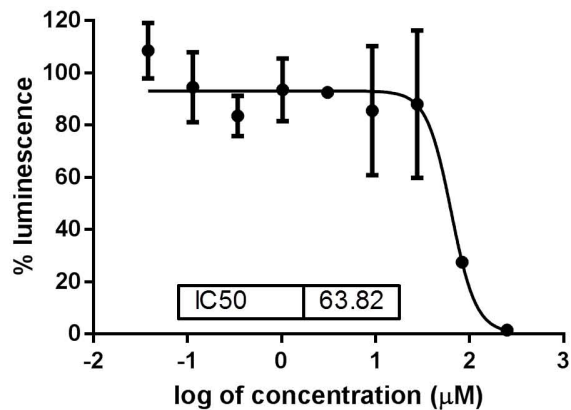

compound 8

3C

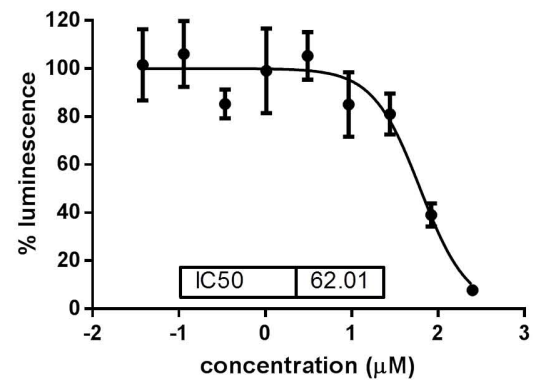

compound 10

**Supplementary Table 1.**

| ID | Structure                                                                           | Binding <sup>1</sup> | ID | Structure                                                                            | Binding   |
|----|-------------------------------------------------------------------------------------|----------------------|----|--------------------------------------------------------------------------------------|-----------|
| 18 | 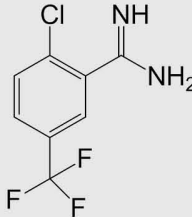   | <b>NB</b>            | 22 |   | <b>NB</b> |
| 19 |    | <b>NB</b>            | 23 |   | <b>+</b>  |
| 20 |   | <b>+</b>             | 24 |  | <b>NB</b> |
| 21 |  | <b>NB</b>            |    |                                                                                      |           |

1. NB indicates no appreciable binding; + indicates significant shifts upon complexation
